# Supplementary material for: Photoactivated proton coupled electron transfer in DNA: insights from quantum mechanical calculations
Source: Royal Society of Chemistry journal article supplement (doi:10.1039/c7fd00195a), 2017-09-26

**Figure S1.** Excited State density difference at the Franck-Condon region for  $(GC)_2$  and  $(AT)_2$ .

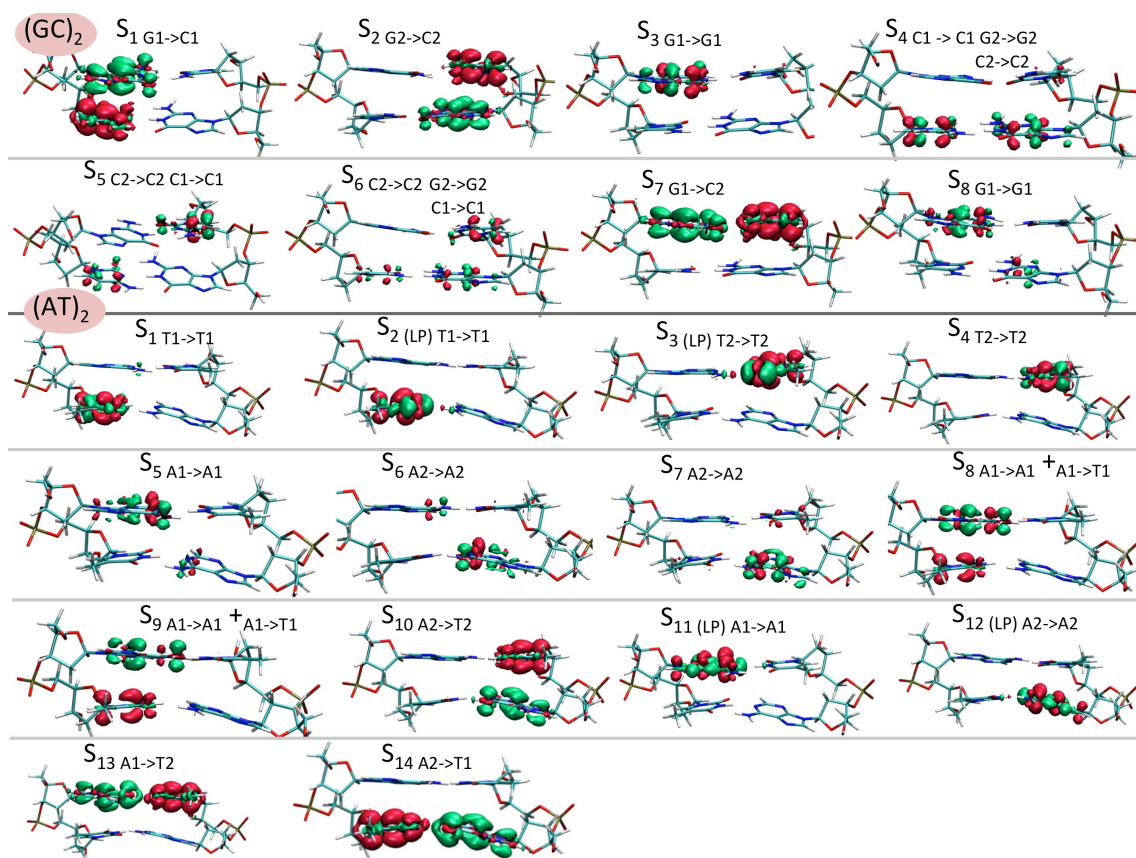

### Comparison between Ground and Excited state minima

As a further step of our analysis we compare here the key geometry shifts obtained from the ground-state and excited-state calculations.

For GC/GC, the C6-O and C2-NH2 bond of  $G^+$  is shorter (Figure S2) than that of neutral G, explaining the former the observed blue-shift of the carbonyl stretch. On the other hand, the C6-O bond for the closed-shell  $G(-D1)^-$  (Intra-ET-PT, Figure S3) is significantly longer than that of neutral G, confirming the single-bond character upon deprotonation and consistent with the large red shift of the vibrational frequency. The C2-O and C5-C6 bonds are larger in  $C^+$  compared to C. The ground-state approach results in a very similar picture as the excited-state calculation (compare Figure S2b and c), being the discrepancies in these critical

distances  $<0.01\text{\AA}$ , indicating that the vibrational spectra obtained by the ground-state calculation are reliable.

**Figure S2.** Tetramer units used in the  $(\text{GC})_2$  DFT/TD-DFT calculations. (a) Ground state  $S_0$  minimum, (b) Cation and anion  $S_0$  minima and (c) Inter and Intrastrand ET  $S_1$  minima. Representative distances in angstroms.

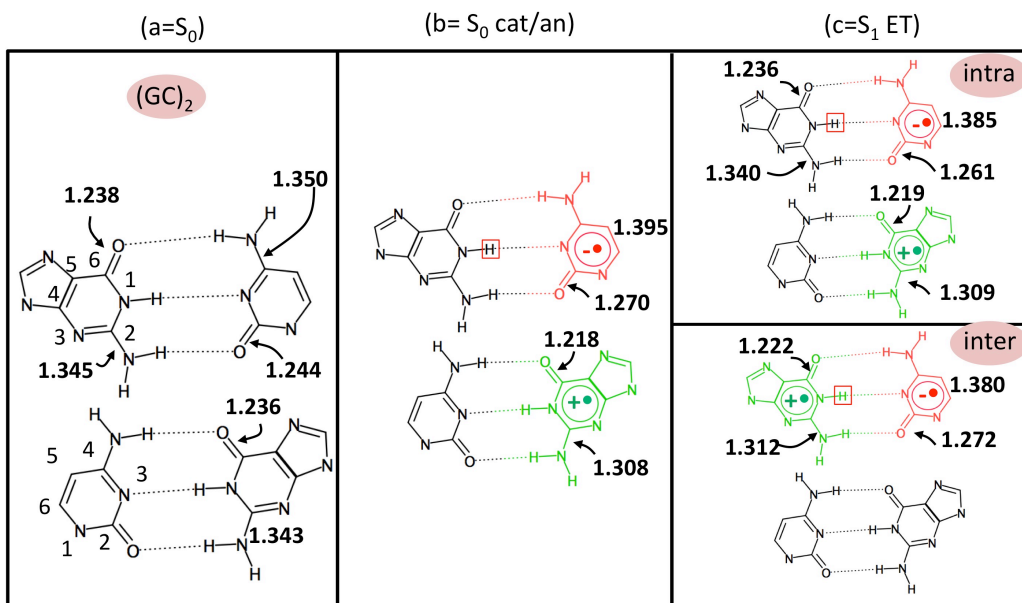

**Figure S3.** Tetramer units used in the  $(\text{GC})_2$  DFT/TD-DFT calculations. (a) Ground state  $S_0$  minimum and (b) Inter and Intrastrand ET-PT  $S_1$  minima. Representative distances in angstroms (in parenthesis for the PT  $S_0$  minima).

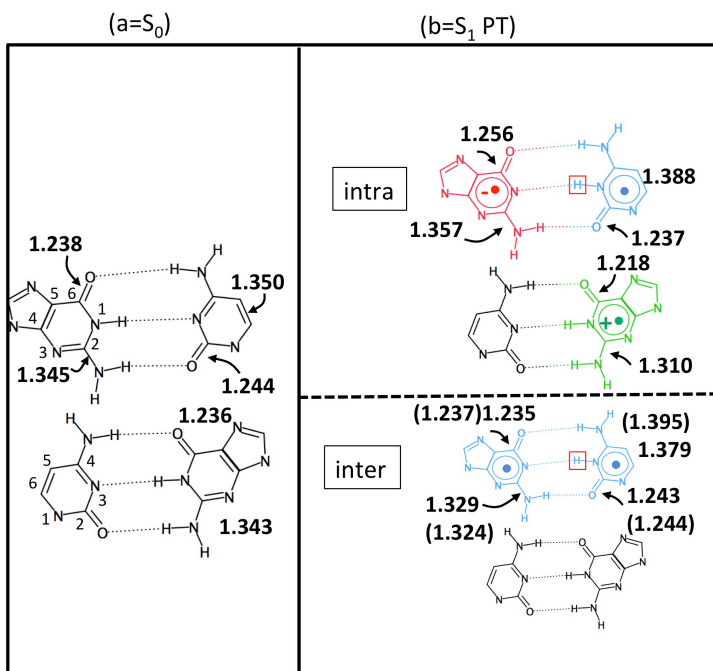

For AT/AT, Figure S4 show that the  $T^{\bullet-}$  radical anion shows C4-O bond significantly elongated respect to neutral T and experience dramatic red shifts; whereas  $A^{\bullet+}$  radical cation presents shorter C6-NH<sub>2</sub> distances compared to A. These key bond lengths are very similar for both ground and excited state calculations. However, the C5-C6 distance is much larger in the ground state  $T^{\bullet-}$  minimum than in the  $S_1$  ET one.

**Figure S4.** Tetramer units used in the (AT)<sub>2</sub> DFT/TD-DFT calculations. (a) Ground state  $S_0$  minimum, (b) Cation and anion  $S_0$  minima and (c) Intrastrand ET  $S_1$  minima. Representative distances in angstroms.

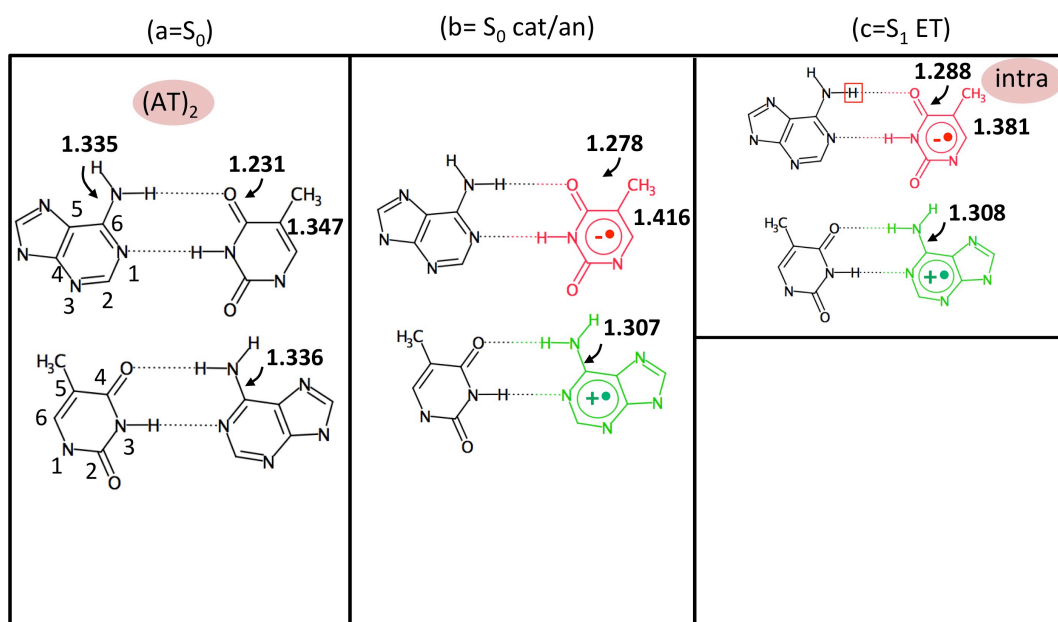

Supplement: c7fd00195a1.pdf [file c7fd00195a1.pdf]
